# Supplementary material for: TMPRSS2 isoform 1 downregulation by G-quadruplex stabilization induces SARS-CoV-2 replication arrest
Source: PubMed Central journal article supplement (PMC10773119; doi:10.1186/s12915-023-01805-w), 2024-01-08

**a****Analysis settings**

Window size: 25  
Threshold: 2

**Analysis results**

Quadruplexes found: 80  
Frequency: 1.8 / 1000 bp

**Sequence info**

TMPRSS2  
43,631 bp  
GC: 21961 (50.4%)

**b**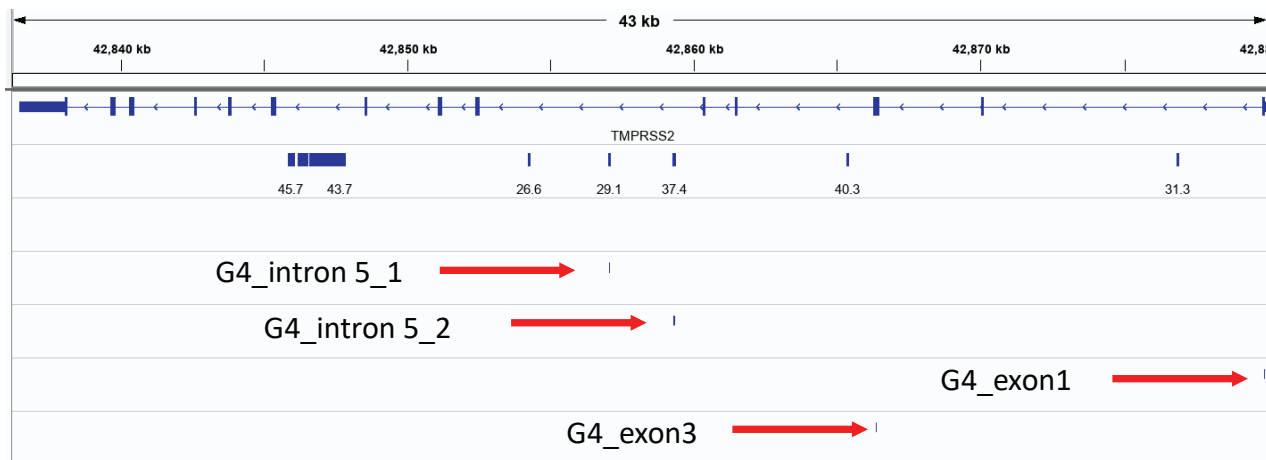**c**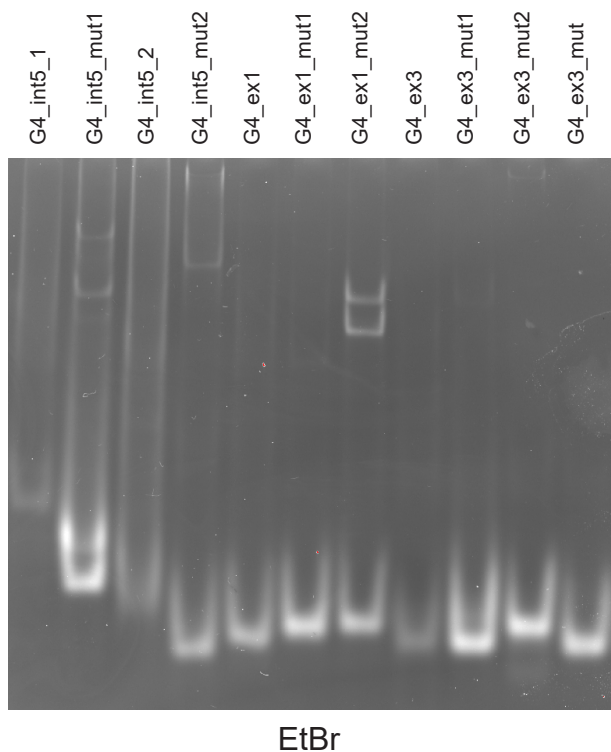

Supplement: 12915_2023_1805_MOESM1_ESM.pdf [file 12915_2023_1805_MOESM1_ESM.pdf]
