# Supplementary material for: TMPRSS2 isoform 1 downregulation by G-quadruplex stabilization induces SARS-CoV-2 replication arrest
Source: PubMed Central journal article supplement (PMC10773119; doi:10.1186/s12915-023-01805-w), 2024-01-08
Supplement: 12915_2023_1805_MOESM2_ESM.pdf [file 12915_2023_1805_MOESM2_ESM.pdf]

|              | sequence                       |
|--------------|--------------------------------|
| G4_int5_1    | TCTGGGGTGTATGGGGGGATGCGGGGTAGG |
| mut_int5_1   | TCTGGGGTGTATGGGGGGATGCCCGTACG  |
| G4_int5_2    | GGGGCGGGGGGTGACAACACTGGGG      |
| mut_int5_2   | GGGGCGCGAAGTGACAACACTCAGG      |
| G4_ex1       | GGGCGGGGCAGGGGGCATCGGCCGGT     |
| mut_G4_ex1_1 | GGGCGCGGCAGGGGGCATCGGCCGGT     |
| mut_G4_ex1_2 | GCGCGCCGCAGGGGGCATCAGCCGGT     |
| G4_ex3       | GGGGCGTACTGGGGCACGGGGGACGG     |
| mut_G4_ex3_1 | GGGGCGTACTGCGGCACGGGGGACGG     |
| mut_G4_ex3_2 | GGGGCGTACTGCGGCACGGGCGACGG     |
| mut_G4_ex3_3 | GGCGCGTACTGCGGCACGGGCGACGG     |

| position                       | G4 Hunter score | Marsico et al |
|--------------------------------|-----------------|---------------|
| chr21: 41,778,914 - 41,778,943 | 2,00            | 29,1          |
|                                |                 |               |
| chr21: 41,781,179 - 41,781,204 | 2,20            | 37,4          |
|                                |                 |               |
| chr21: 41,801,784 - 41,801,809 | 2,00            |               |
|                                |                 |               |
|                                |                 |               |
| chr21: 41,801,784 - 41,801,809 | 2,07            |               |
|                                |                 |               |
|                                |                 |               |
|                                |                 |               |
