# Supplementary material for: TMPRSS2 isoform 1 downregulation by G-quadruplex stabilization induces SARS-CoV-2 replication arrest
Source: PubMed Central journal article supplement (PMC10773119; doi:10.1186/s12915-023-01805-w), 2024-01-08

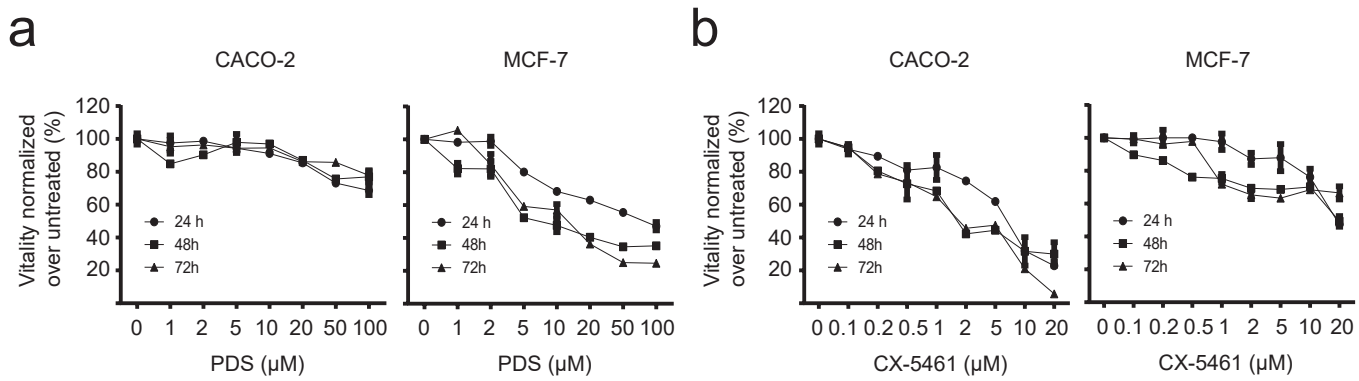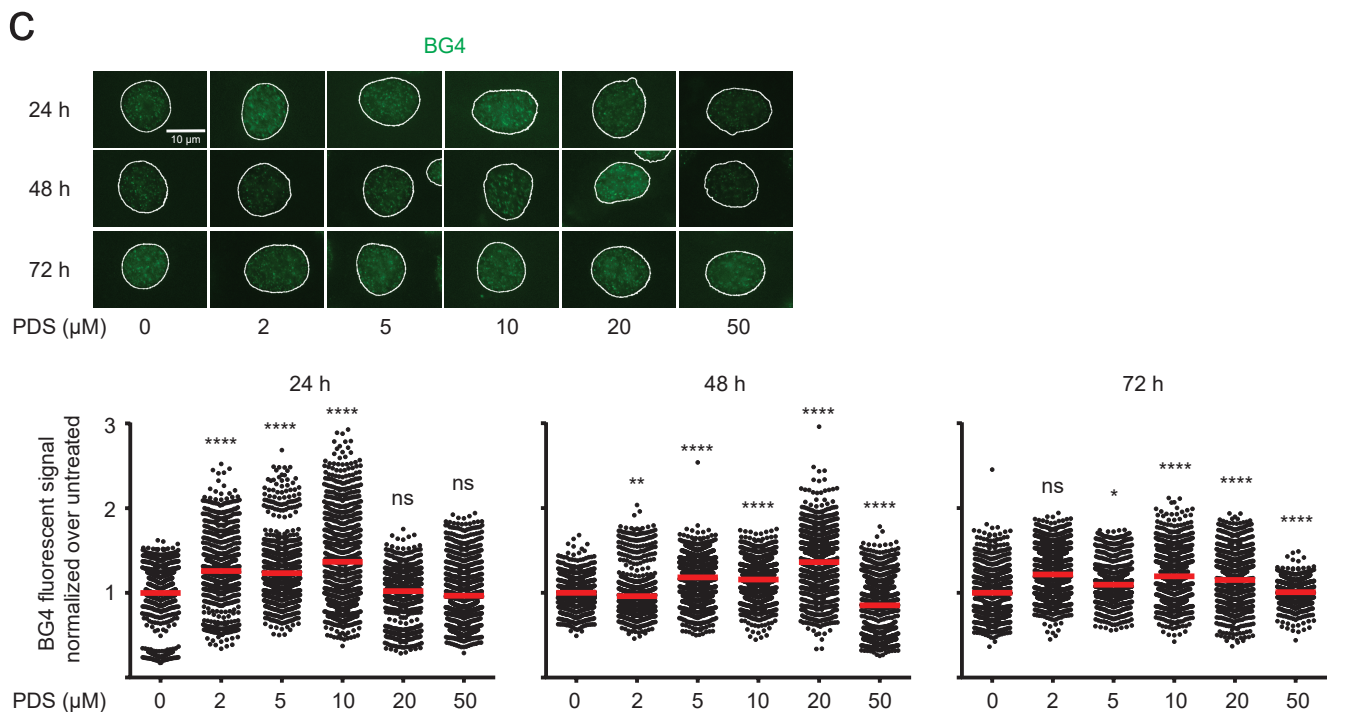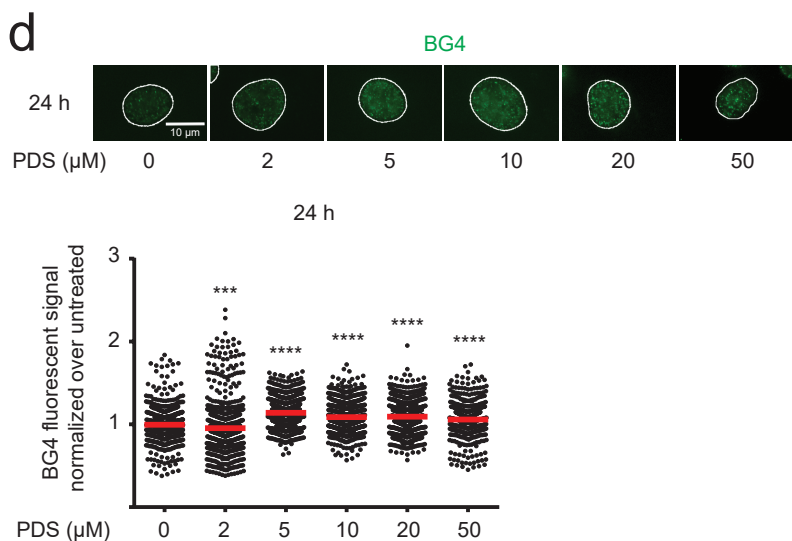

Supplement: 12915_2023_1805_MOESM3_ESM.pdf [file 12915_2023_1805_MOESM3_ESM.pdf]
