# Supplementary material for: TMPRSS2 isoform 1 downregulation by G-quadruplex stabilization induces SARS-CoV-2 replication arrest
Source: PubMed Central journal article supplement (PMC10773119; doi:10.1186/s12915-023-01805-w), 2024-01-08
Supplement: 12915_2023_1805_MOESM4_ESM.pdf [file 12915_2023_1805_MOESM4_ESM.pdf]

**a**
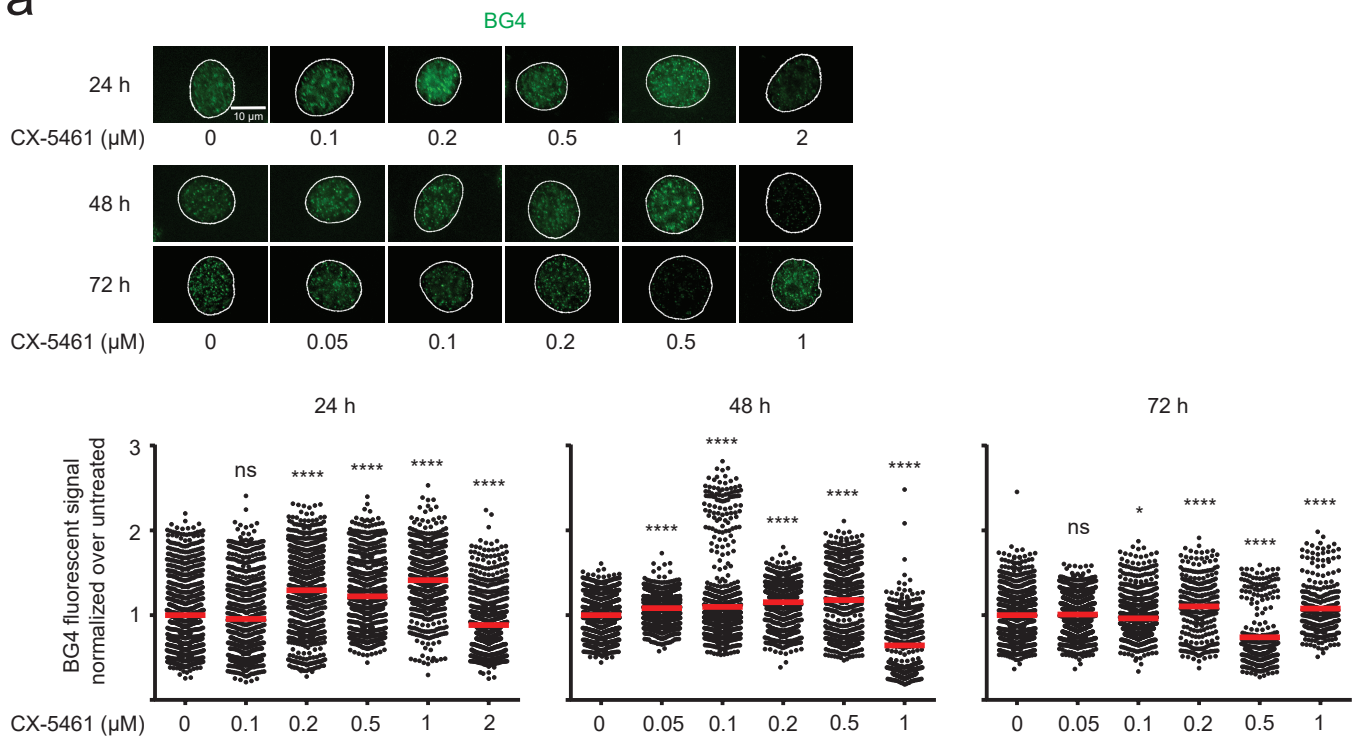
**b**
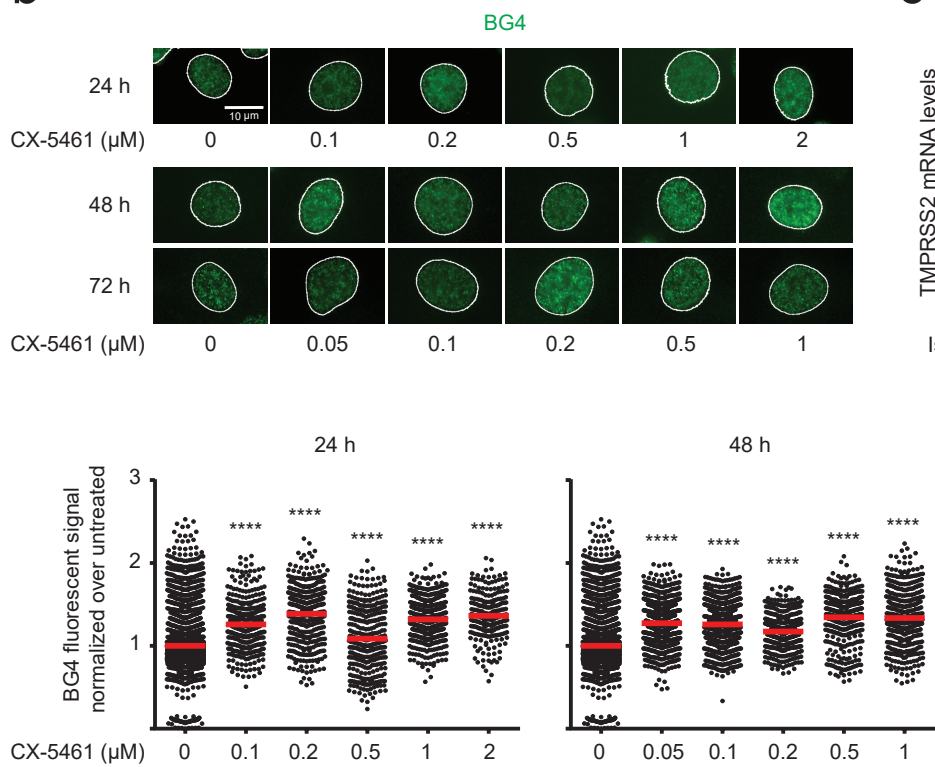
**c**
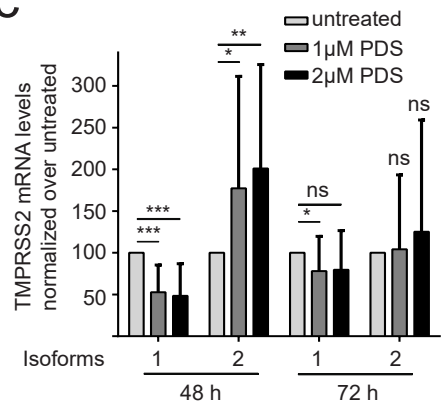
 CX-5461 ( $\mu\text{M}$ )
