# Supplementary material for: TMPRSS2 isoform 1 downregulation by G-quadruplex stabilization induces SARS-CoV-2 replication arrest
Source: PubMed Central journal article supplement (PMC10773119; doi:10.1186/s12915-023-01805-w), 2024-01-08
Supplement: 12915_2023_1805_MOESM6_ESM.pdf [file 12915_2023_1805_MOESM6_ESM.pdf]

|                   | sequence                                          |
|-------------------|---------------------------------------------------|
| G4_5'-UTR_iso1    | ccggctcggggtccgggctggggaggggaaacctgggcgcctgggac   |
| mutG4_5'-UTR_iso1 | ccggctcgcggtccgcgctgCCgagCCgaacctgCGcgcctgCGac    |
| G4_5'-UTR_iso2    | caggaggcggaggcggaggcggaggcgaggggcggggagcgcgcctgg  |
| mutG4_5'-UTR_iso1 | caggagcCGcagCCgCagCCggagCGcgagCCgcgCCgagcgcgcctCG |

| position                       |
|--------------------------------|
| chr21: 41,508,011 - 41,508,056 |
|                                |
| chr21: 41,508,091 - 41,508,140 |
|                                |
