# Supplementary material for: TMPRSS2 isoform 1 downregulation by G-quadruplex stabilization induces SARS-CoV-2 replication arrest
Source: PubMed Central journal article supplement (PMC10773119; doi:10.1186/s12915-023-01805-w), 2024-01-08
Supplement: 12915_2023_1805_MOESM7_ESM.pdf [file 12915_2023_1805_MOESM7_ESM.pdf]

|                | sequence                                                    |
|----------------|-------------------------------------------------------------|
| G4_5'-UTR_iso1 | ccggctcggggtccgggctggggaggggaacctgggcgcctgggac              |
| SNP1           | ccggctcggggtccg <sup>a</sup> gctggggaggggaacctgggcgcctgggac |
| SNP2           | ccggctcggggtccgggctggggagg <sup>a</sup> aacctgggcgcctgggac  |
| SNP3           | ccggctcggggtccgggctggggaggggaacctgg <sup>a</sup> cgctgggac  |
| SNP4           | ccggctcggggtccgggctggggaggggaacctgggcgcctg <sup>a</sup> gac |

| position                       | NCBI reference |
|--------------------------------|----------------|
| chr21: 41,508,011 - 41,508,056 |                |
|                                | rs1430156730   |
|                                | rs565468881    |
|                                | rs2091471351   |
|                                | rs2091471316   |
